# Supplementary material for: Microbiome Profiling Using Shotgun Metagenomic Sequencing Identified Unique Microorganisms in COVID-19 Patients With Altered Gut Microbiota
Source: Front Microbiol. 2021 Oct 11;12:712081. doi: 10.3389/fmicb.2021.712081 (PMC8542975; doi:10.3389/fmicb.2021.712081)
Supplement: Supplementary Table S10 — Sequencing information of 66 samples. [file Table_10.XLSX]

## Sheet: Sheet1
Sample	RawReadNum	RawSize	CleanReadNum	CleanSize	RatioReads	RatioSize
C001	51816250	7772437500	51807126	7771068900	0.9998	0.9998
C002	51381954	7707293100	51377442	7706616300	0.9999	0.9999
C003	50453910	7568086500	50438704	7565805600	0.9997	0.9997
C004	50146354	7521953100	50120866	7518129900	0.9995	0.9995
C005	51578070	7736710500	51572606	7735890900	0.9999	0.9999
C006	51444676	7716701400	51442704	7716405600	1	1
C007	51193444	7679016600	51191752	7678762800	1	1
C008	50961304	7644195600	50919980	7637997000	0.9992	0.9992
C009	50038888	7505833200	50021642	7503246300	0.9997	0.9997
C010	52040282	7806042300	51836736	7775510400	0.9961	0.9961
C011	51274338	7691150700	51267214	7690082100	0.9999	0.9999
C012	43131262	6469689300	43112096	6466814400	0.9996	0.9996
C013	51432910	7714936500	51425766	7713864900	0.9999	0.9999
C014	49487612	7423141800	49480210	7422031500	0.9999	0.9999
C015	46861274	7029191100	46844682	7026702300	0.9996	0.9996
C016	49755252	7463287800	49752786	7462917900	1	1
C017	50509448	7576417200	49356526	7403478900	0.9772	0.9772
C018	51562692	7734403800	51464576	7719686400	0.9981	0.9981
C019	48095004	7214250600	48082810	7212421500	0.9997	0.9997
M001	30362834	4554425100	30361692	4554253800	1	1
M002	30734922	4610238300	30681120	4602168000	0.9982	0.9982
M003	31224244	4683636600	31066262	4659939300	0.9949	0.9949
M004	31648650	4747297500	31646248	4746937200	0.9999	0.9999
M005	35055884	5258382600	34862058	5229308700	0.9945	0.9945
M006	35544578	5331686700	35499636	5324945400	0.9987	0.9987
M007	32429396	4864409400	31717382	4757607300	0.978	0.978
M008	32045506	4806825900	31885712	4782856800	0.995	0.995
M009	29067622	4360143300	29000494	4350074100	0.9977	0.9977
M010	33397234	5009585100	33337572	5000635800	0.9982	0.9982
M011	37199916	5579987400	37081684	5562252600	0.9968	0.9968
M012	35578720	5336808000	35576708	5336506200	0.9999	0.9999
M013	35107478	5266121700	35085732	5262859800	0.9994	0.9994
M014	35642634	5346395100	35387516	5308127400	0.9928	0.9928
M015	33898442	5084766300	33799998	5069999700	0.9971	0.9971
M016	71487800	10556339398	22648568	3235985728	0.3168	0.3065
M017	36190604	5428590600	35457886	5318682900	0.9798	0.9798
M018	32622992	4893448800	32619166	4892874900	0.9999	0.9999
M019	35629912	5344486800	35578686	5336802900	0.9986	0.9986
M020	35577456	5336618400	35573354	5336003100	0.9999	0.9999
M021	35792774	5368916100	35747532	5362129800	0.9987	0.9987
M022	35684610	5352691500	35675120	5351268000	0.9997	0.9997
M023	32172666	4825899900	25661684	3849252600	0.7976	0.7976
M024	36650374	5497556100	36569912	5485486800	0.9978	0.9978
M025	36254522	5438178300	36187130	5428069500	0.9981	0.9981
M027	35164810	5274721500	34253376	5138006400	0.9741	0.9741
M028	37645356	5646803400	37633488	5645023200	0.9997	0.9997
M029	35662490	5349373500	35609624	5341443600	0.9985	0.9985
M030	35864342	5379651300	35860586	5379087900	0.9999	0.9999
S001	35394054	5309108100	35390438	5308565700	0.9999	0.9999
S002	36213820	5432073000	34756378	5213456700	0.9598	0.9598
S003	30885202	4632780300	30876216	4631432400	0.9997	0.9997
S004	32130310	4819546500	32100620	4815093000	0.9991	0.9991
S005	31679374	4751906100	31666952	4750042800	0.9996	0.9996
S006	33141508	4971226200	33133100	4969965000	0.9997	0.9997
S009	35793898	5369084700	35765348	5364802200	0.9992	0.9992
S010	35723880	5358582000	34816104	5222415600	0.9746	0.9746
S011	52269316	7840397400	15269814	2288403408	0.2921	0.2919
S012	48521678	7278251700	48403516	7257681837	0.9976	0.9972
S013	35033168	5254975200	34218400	5130816323	0.9767	0.9764
S014	42750502	6412575300	42468604	6367738356	0.9934	0.993
S015	34962094	5244314100	31369098	4703443313	0.8972	0.8969
S016	32030762	4804614300	31712906	4755060774	0.9901	0.9897
S017	26130568	3919585200	25627246	3842561503	0.9807	0.9803
S018	42431550	6364732500	42331646	6347314209	0.9976	0.9973
S019	45547596	6832139400	30869004	4628200988	0.6777	0.6774
S020	44305512	6645826800	44291974	6641206418	0.9997	0.9993
